# Supplementary material for: Simplified fast synthesis of strong-coupling composite supercapacitor materials by one-step bipolar pulse electrodeposition
Source: Royal Society of Chemistry journal article supplement (doi:10.1039/d2ta03436k), 2022-01-01
Supplement: d2ta03436k1.pdf [file d2ta03436k1.pdf]

# **Simplified Fast Synthesis of Strong-Coupling Composite Supercapacitor Materials by One-Step Bipolar Pulse Electrodeposition**

Hao Liu<sup>a</sup>, Haochang Chen<sup>a</sup>, Shunzhe Zhang<sup>a</sup>, Kaifeng Wang<sup>a</sup>, Lei Yang<sup>a,b,\*</sup>, Yujie Chen<sup>a</sup>, Hezhou Liu<sup>a</sup>, Hua Li<sup>a,b,\*</sup>

<sup>a</sup>State Key Laboratory of Metal Matrix Composites, School of Materials Science and Engineering, Shanghai Jiao Tong University, Shanghai 200240, PR China

<sup>b</sup>National Engineering Research Center of Light Alloy Net Forming, School of Materials Science and Engineering, Shanghai Jiao Tong University, Shanghai, 200240, China

\*Corresponding author

E-mail address: yanglei1983@sjtu.edu.cn (Lei Yang), lih@sjtu.edu.cn (Hua Li)

Table S1 Comparison of preparation steps and time of various NiCoS/PPy with different structure designs.

| electrode materials                     | Step one (The required time)            | Step two (The required time)            | Step three (The required time)                  | references |
|-----------------------------------------|-----------------------------------------|-----------------------------------------|-------------------------------------------------|------------|
| <b>This work</b>                        | <b>NiCoS/PPy</b>                        |                                         |                                                 |            |
|                                         | <b>(2400 s)</b>                         |                                         |                                                 |            |
| NiCo <sub>2</sub> S <sub>4</sub> @PPy/C | NiCo <sub>2</sub> S <sub>4</sub> /NF    | NiCo <sub>2</sub> S <sub>4</sub> @PPy/N |                                                 | 1          |
| F                                       | (12+14 h)                               | F (90 s)                                |                                                 |            |
| Co <sub>9</sub> S <sub>8</sub> @PPy@Ni  | Co <sub>9</sub> S <sub>8</sub> on CC    | layer of PPy                            | Electrodeposition                               | 2          |
| Co-LDH NTAs                             | (10+6 h)                                | (3 h)                                   | NiCo-LDH                                        |            |
| NiCo <sub>2</sub> S <sub>4</sub> @PPy   | NiCo <sub>2</sub> S <sub>4</sub>        | NiCo <sub>2</sub> S <sub>4</sub> @PPy   |                                                 | 3          |
|                                         | (6+7 h)                                 | (9 h)                                   |                                                 |            |
| PPy@NiCo <sub>2</sub> S <sub>4</sub>    | PPy nanotubes                           | PPy@SiO <sub>2</sub> NTs                | PPy@NiCo <sub>2</sub> S <sub>4</sub> core-shell | 4          |
|                                         | (12 h)                                  | (3 h)                                   | (12+12 h)                                       |            |
| PPy@NiCo <sub>2</sub> S <sub>4</sub> /G | NiCo <sub>2</sub> S <sub>4</sub> /GF    | PPy@NiCo <sub>2</sub> S <sub>4</sub> /G |                                                 | 5          |
| F                                       | (8+12 h)                                | (24 h)                                  |                                                 |            |
| CoNi <sub>2</sub> S <sub>4</sub> @PPy/N | CoNi <sub>2</sub> S <sub>4</sub> /N-3DG | CoNi <sub>2</sub> S <sub>4</sub> @PPy/N |                                                 | 6          |
| -3DG                                    | (4+10 h)                                | -3DG (10 min)                           |                                                 |            |
| NiCoS@PPy                               | PPy tubes                               | ZIF-67@PPy                              | NiCoS@PPy                                       | 7          |
|                                         | (24 h)                                  | (24 h)                                  | (4 h)                                           |            |

|                                               |                                                       |                                                         |    |
|-----------------------------------------------|-------------------------------------------------------|---------------------------------------------------------|----|
| NiCo-MOF@PPy                                  | PPy nanotubes<br>(24 h)                               | NiCo-MOF@Ppy<br>(8 h)                                   | 8  |
| NiCo <sub>2</sub> S <sub>4</sub> @PPy-Ni foam | NiCo <sub>2</sub> S <sub>4</sub> -Ni foam<br>(8+12 h) | NiCo <sub>2</sub> S <sub>4</sub> @PPy-Ni foam<br>(12 h) | 9  |
| CNS/PPy/CP                                    | S@PPy                                                 | CNS/PPy/CP<br>(4000 s)                                  | 10 |

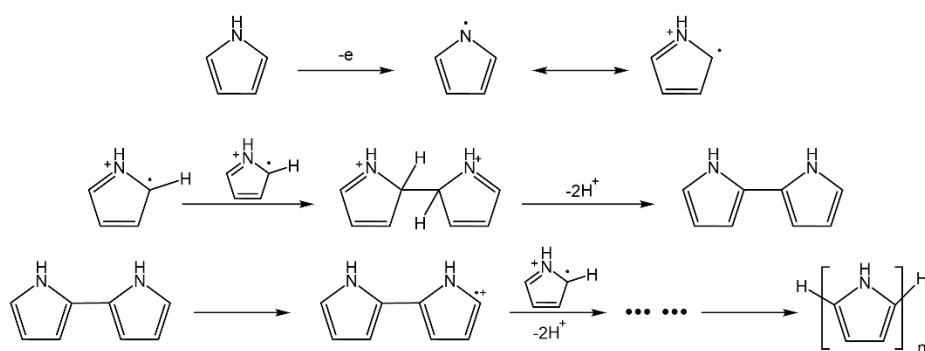

**Fig. S1.** Mechanism of electro polymerization of pyrrole.

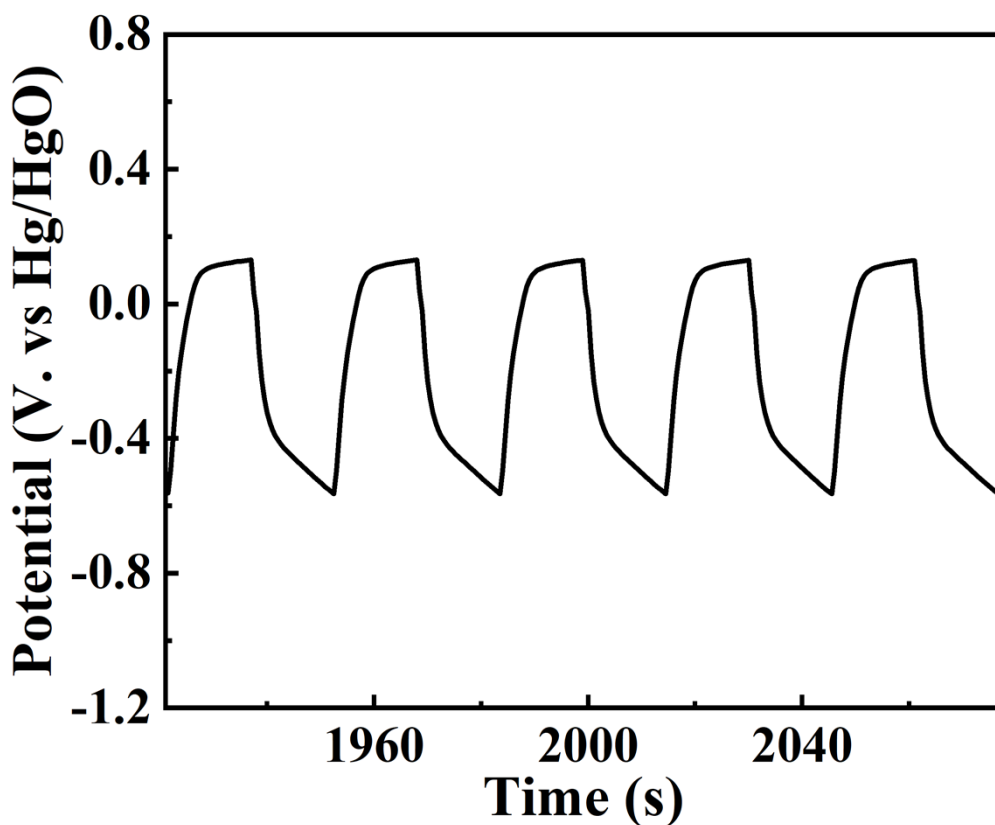

Fig. S2. The potential-time curve after stabilization of NCS/P-3.

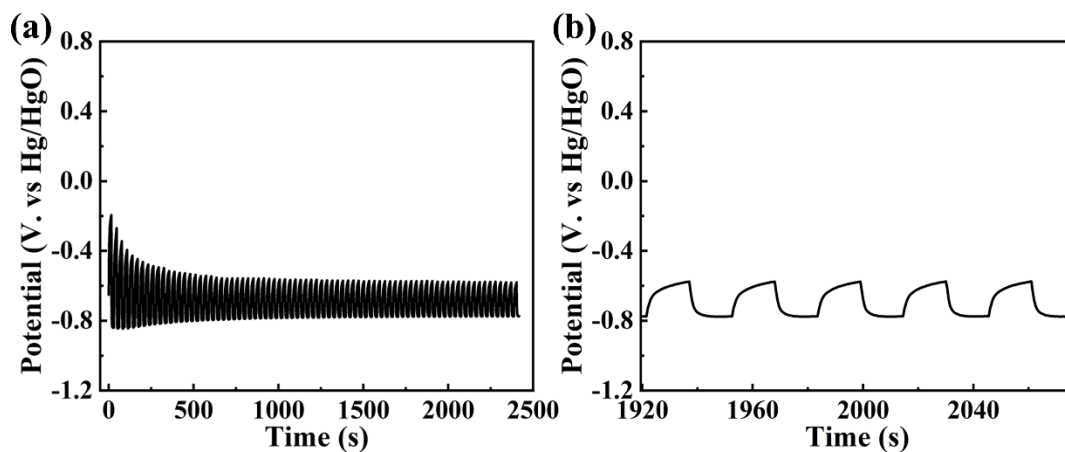

Fig. S3. The potential-time curve during the preparation of NCS/P-1 (a), and the potential-time curve after stabilization of NCS/P-1 (b).

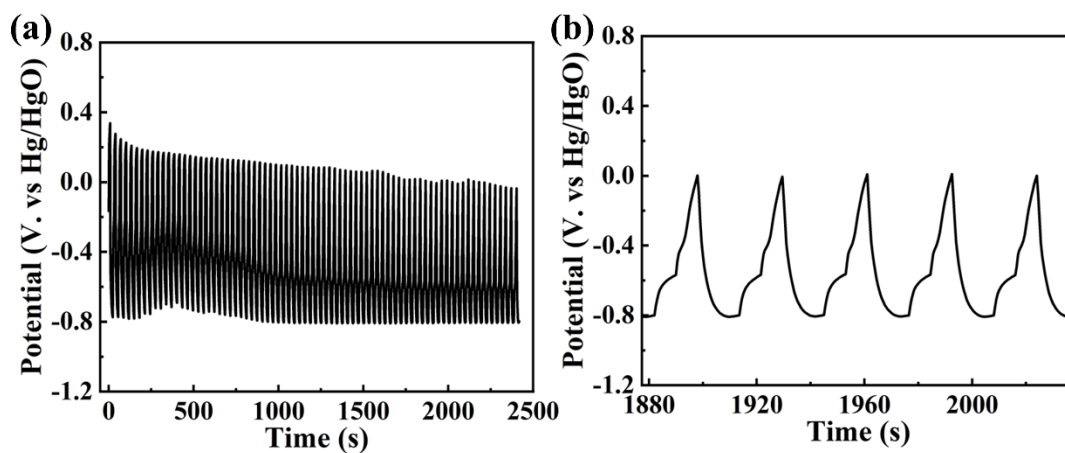

**Fig. S4.** The potential-time curve during the preparation of NCS/P-2 (a), and the potential-time curve after stabilization of NCS/P-2 (b).

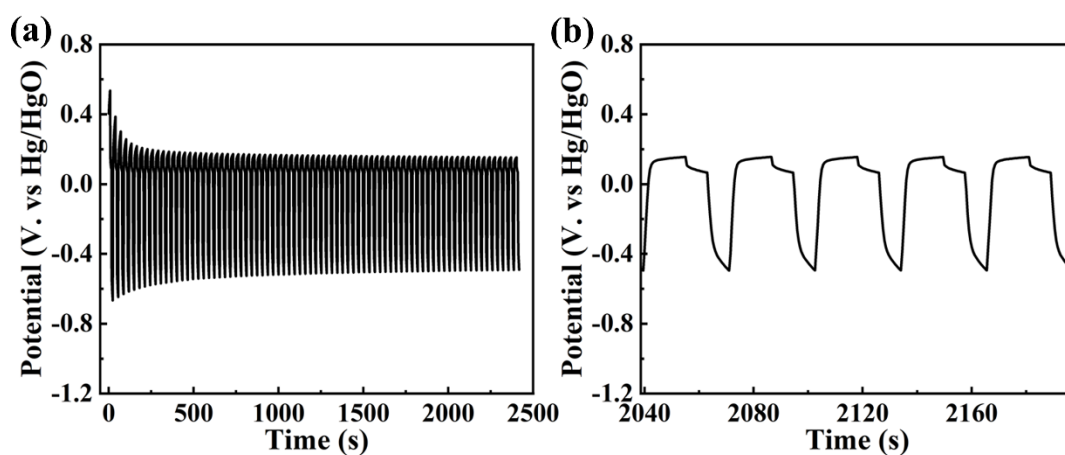

**Fig. S5.** The potential-time curve during the preparation of NCS/P-4 (a), and the potential-time curve after stabilization of NCS/P-4 (b).

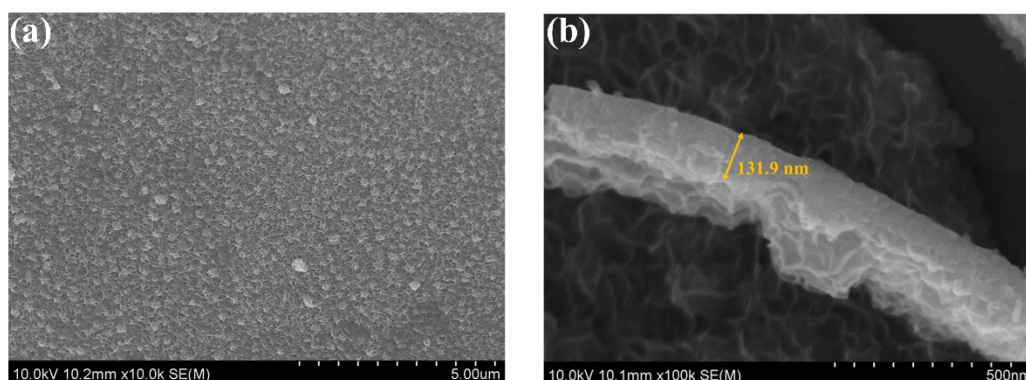

**Fig. S6.** SEM images of (a) NCS/P-1, SEM section images of (b) NCS/P-1.

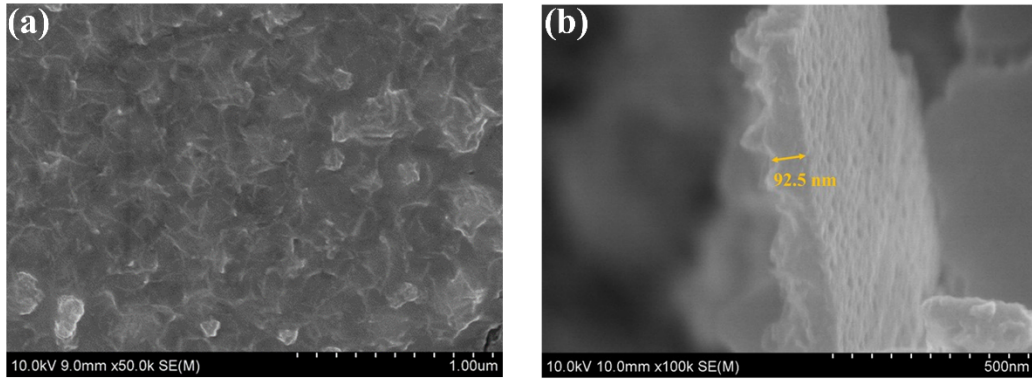

**Fig. S7.** SEM images of (a-b) NCS/P-2, SEM section images of (c) NCS/P-2.

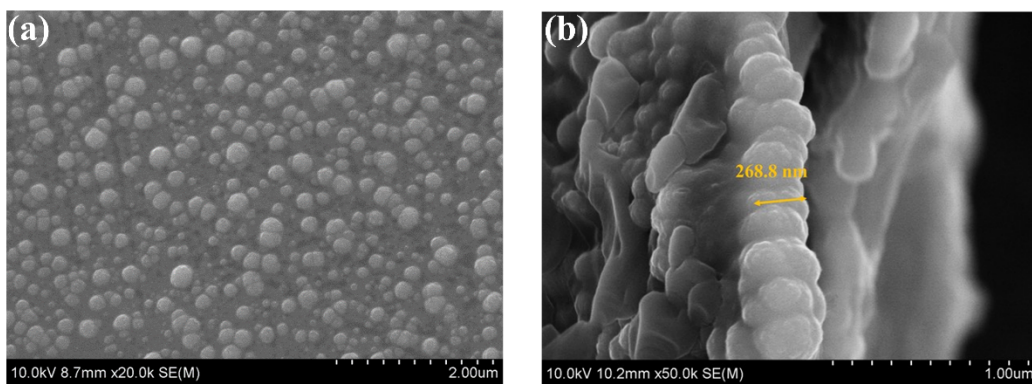

**Fig. S8.** SEM images of (a) NCS/P-4, SEM section images of (b) NCS/P-4.

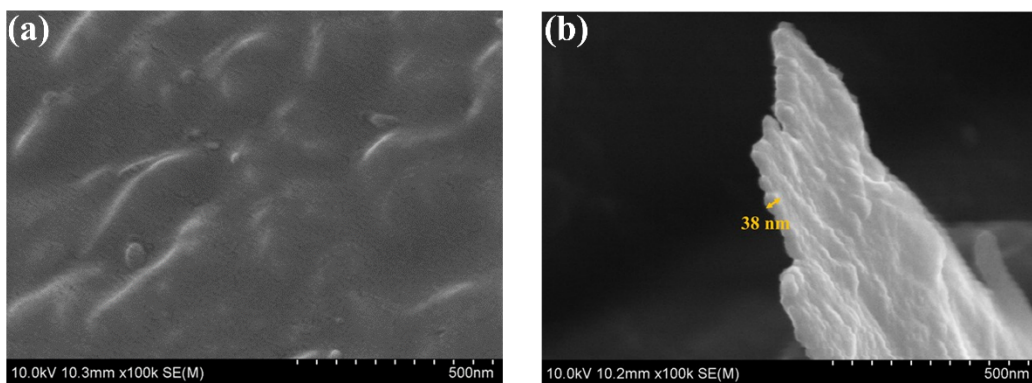

**Fig. S9.** SEM images of (a) Pure PPy, SEM section images of (b) Pure PPy.

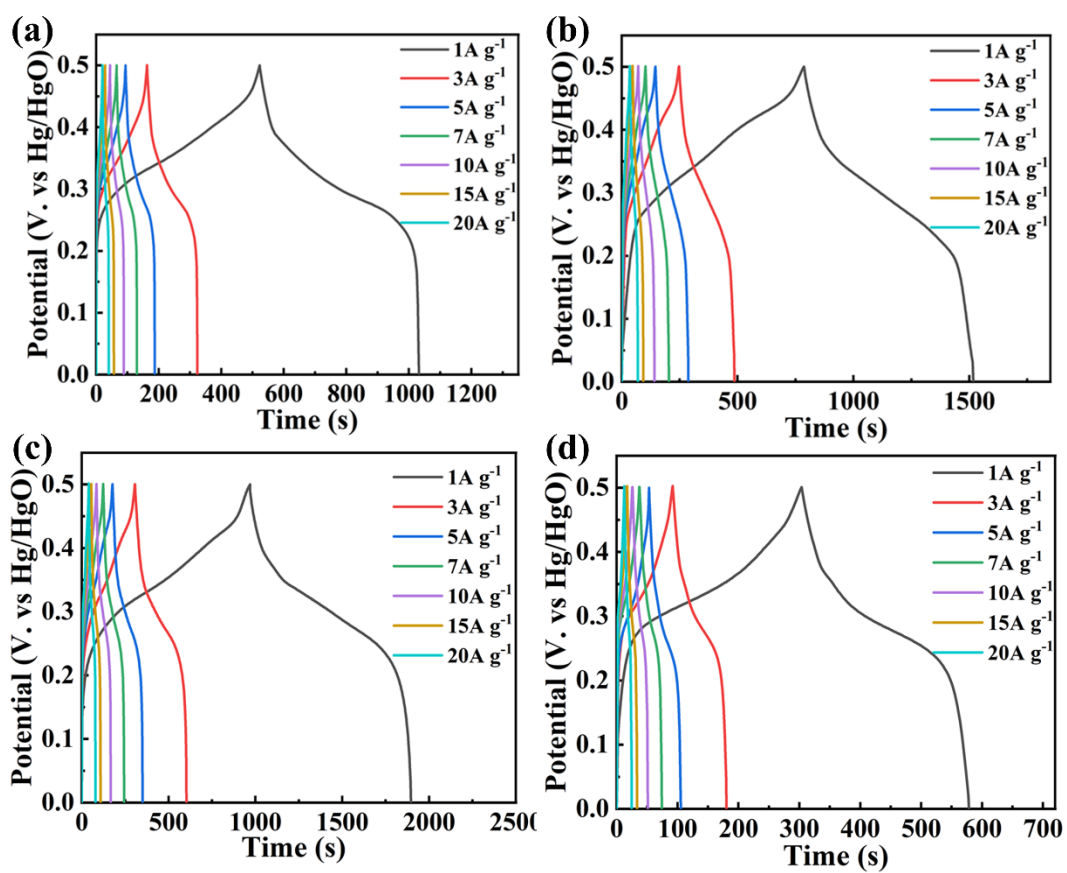

**Fig. S10.** The GCD at various current density of (a) NCS/P-1, (b) NCS/P-2, (c) NCS/P-3, (d) NCS/P-4.

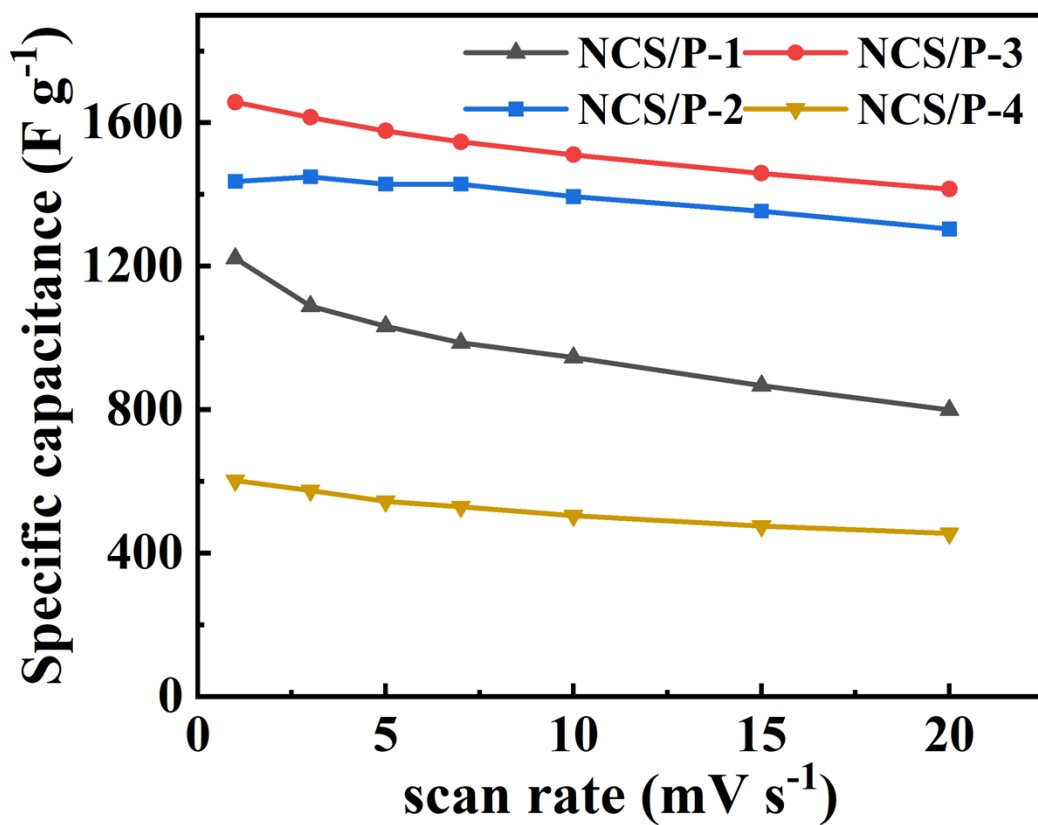

Fig. S11. The specific capacitance of electrodes at various scan rates.

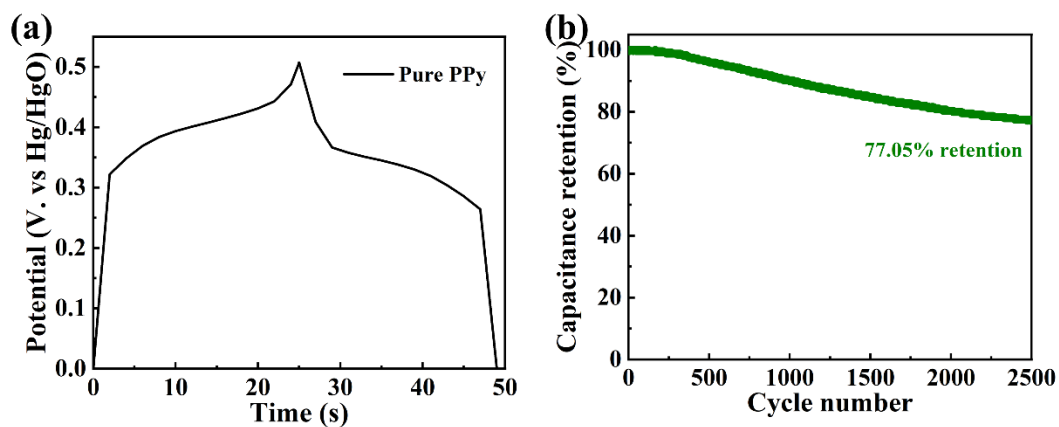

Fig. S12. The GCD at  $5 \text{ A g}^{-1}$  of pure PPy electrode (a), and the cycling performance of pure PPy electrode at the current density of  $10 \text{ A g}^{-1}$  (b).



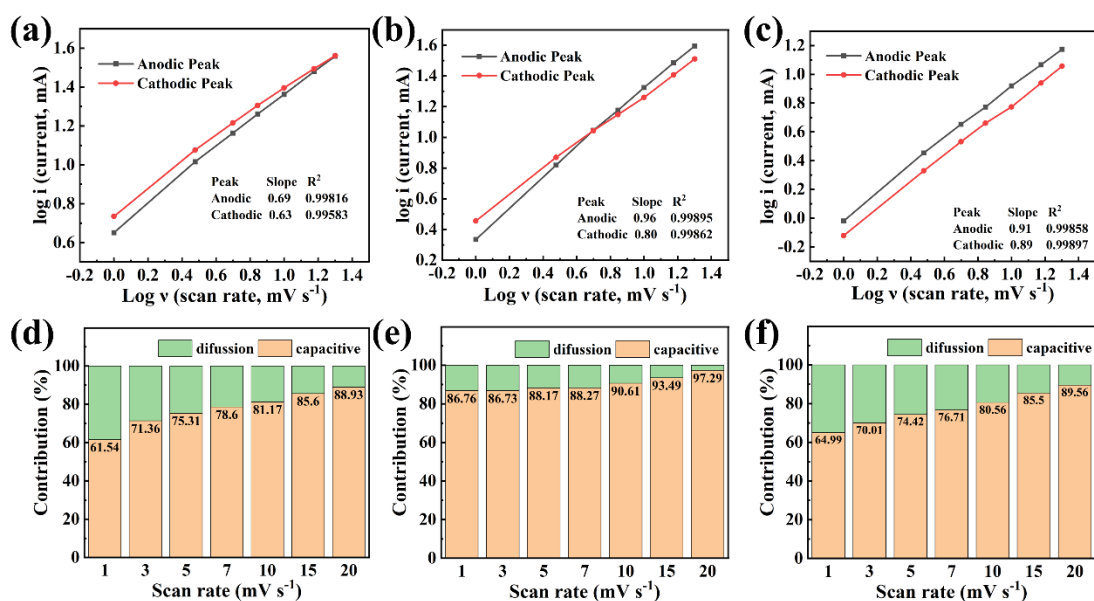

**Fig. S13.** Log ( $i$ ) as a function of log ( $v$ ) of (a) NCS/P-1, (b) NCS/P-2, (c) NCS/P-4. The contribution fractions of the capacitive and diffusion-controlled processes of (d) NCS/P-1, (e) NCS/P-2, (f) NCS/P-4.

## Reference:

1. M. Yan, Y. Yao, J. Wen, L. Long, M. Kong, G. Zhang, X. Liao, G. Yin and Z. Huang, *ACS Appl Mater Interfaces*, 2016, **8**, 24525-24535.
2. L. Wang, S. K. Li, F. Z. Huang, X. Y. Yu, M. J. Liu and H. Zhang, *Journal of Power Sources*, 2019, **439**.
3. J. Li, Y. J. Zou, B. Li, F. Xu, H. L. Chu, S. J. Qiu, J. Zhang, L. X. Sun and C. L. Xiang, *Ceramics International*, 2021, **47**, 16562-16569.
4. Y. Y. Zheng, J. Xu, X. S. Yang, Y. J. Zhang, Y. Y. Shang and X. Y. Hu, *Chemical Engineering Journal*, 2018, **333**, 111-121.
5. Y. F. Zhu, F. F. Wang, H. L. Zhang, X. B. Lv, Z. F. Hu, H. Han, X. Y. Fan, J. Y. Ji and X. D. Guo, *Journal of Alloys and Compounds*, 2018, **747**, 276-282.

6. B. Liu, R. W. Mo, D. Z. Kong, Y. Wang and H. Y. Yang, *Flatchem*, 2017, **6**, 1-10.
7. X. Y. Zhao, Q. X. Ma, K. Tao and L. Han, *Acs Applied Energy Materials*, 2021, **4**, 4199-4207.
8. Y. X. Liu, Y. Z. Wang, Y. J. Chen, C. Wang and L. Guo, *Applied Surface Science*, 2020, **507**.
9. X. Wu, L. Meng, Q. Wang, W. Zhang and Y. Wang, *Chemical Engineering Journal*, 2019, **358**, 1464-1470.
10. X. Li, W. Yan, S. Guo, Y. Liu, J. Niu, L. Yin and Z. Wang, *Electrochimica Acta*, 2021, **387**.
